# Supplementary material
Source: publisher figshare collection journal article supplement (https://acs.figshare.com/ndownloader/files/4477987)
Supplement: Supplementary file 1 [file 4477987]

## Supporting Information

# pH-Controllable Bioelectrocatalysis Based on “On-Off” Switching Redox Property of Electroactive Probes for Spin-Assembled Layer-by-Layer Films Containing Branched Poly(ethyleneimine)

*Shaoling Song, Naifei Hu\**

Department of Chemistry, Beijing Normal University, Beijing 100875, P. R. China

\* Corresponding author:

Professor Naifei Hu

E-mail: [hunaifei@bnu.edu.cn](mailto:hunaifei@bnu.edu.cn).

Tel: (+86) 10-5880-5498

Fax: (+86) 10-5880-2075

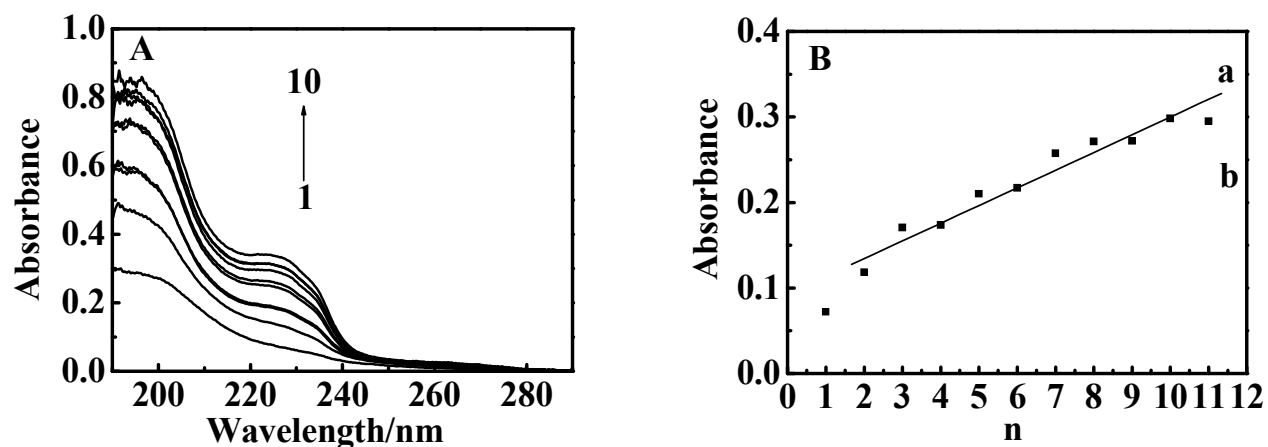

**Figure S1.** (A) UV-vis absorption spectra of BPEI/{PSS/BPEI}<sub>n</sub> films assembled with different number of bilayers (n). (B) Dependence of absorbance at 226 nm on the number of bilayers (n) for BPEI/{PSS/BPEI}<sub>n</sub> films.

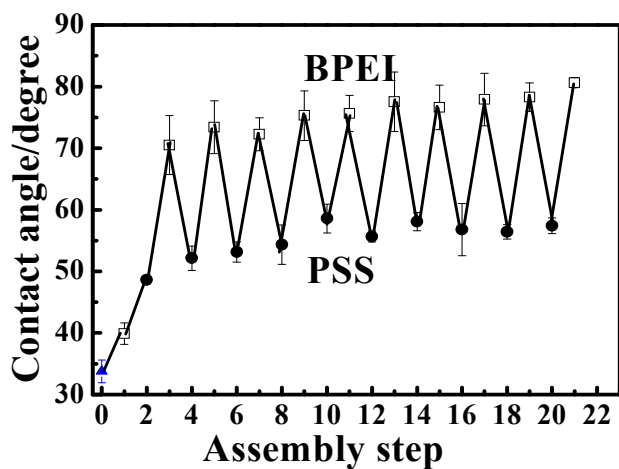

**Figure S2.** Contact angle measurement of each assembly step for BPEI/{PSS/BPEI}<sub>n</sub> films on Au/MPS (▲) surface: BPEI (□) and PSS (●) steps. Every point represents the average of three parallel measurements.

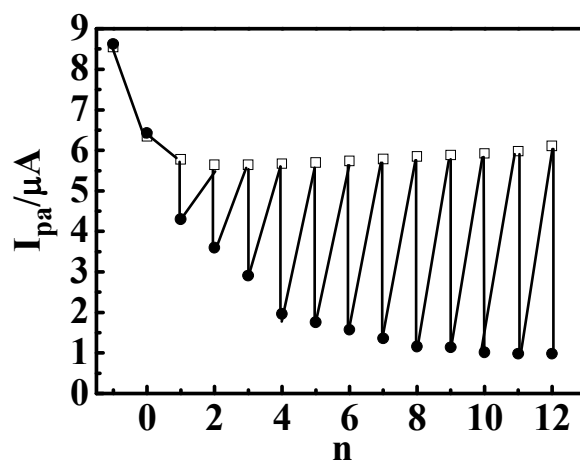

**Figure 3S.** Influence of the number of bilayers ( $n$ ) of BPEI/{PSS/BPEI} ${}_n$  films on CV oxidation peak currents ( $I_{pa}$ ) of 0.2 mM Fc(COOH) $_2$  in buffers at pH 4.0 (□) and 7.0 (●) at 0.1 V s $^{-1}$ . The first two points are the  $I_{pa}$  values of Fc(COOH) $_2$  at bare PG electrodes in solutions at pH 4.0 and 7.0, respectively.

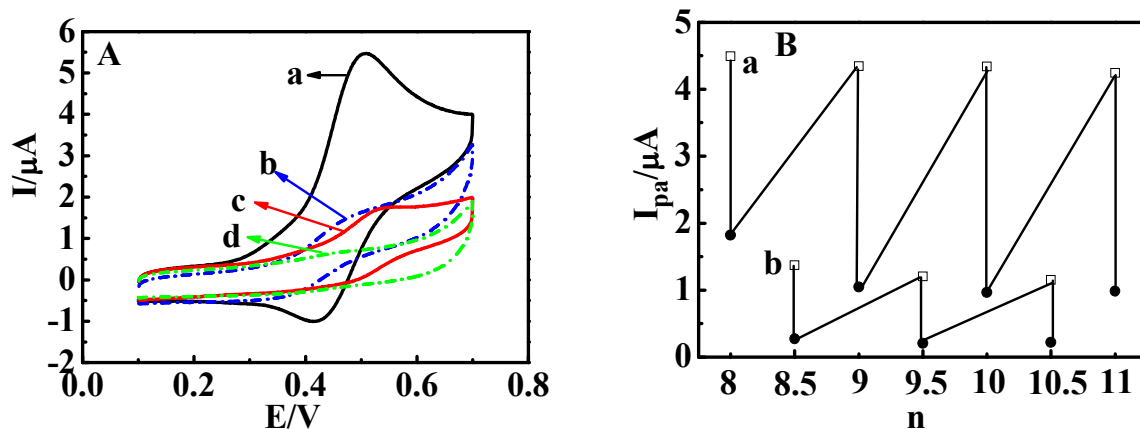

**Figure S4.** (A) CVs of 0.2 mM Fc(COOH) at 0.1 V s $^{-1}$  for BPEI/{PSS/BPEI} ${}_{10}$  films at pH (a) 4.0 and (b) 7.0 and BPEI/{PSS/BPEI} ${}_{10}$ /PSS films at pH (c) 4.0 and (d) 7.0. (B) The dependence of CV oxidation peak currents ( $I_{pa}$ ) of Fc(COOH) $_2$  on the bilayer number ( $n$ ) for (a) BPEI/{PSS/BPEI} ${}_n$  and (b) BPEI/{PSS/BPEI} ${}_n$ /PSS films at pH 4.0 (□) and 7.0 (●).

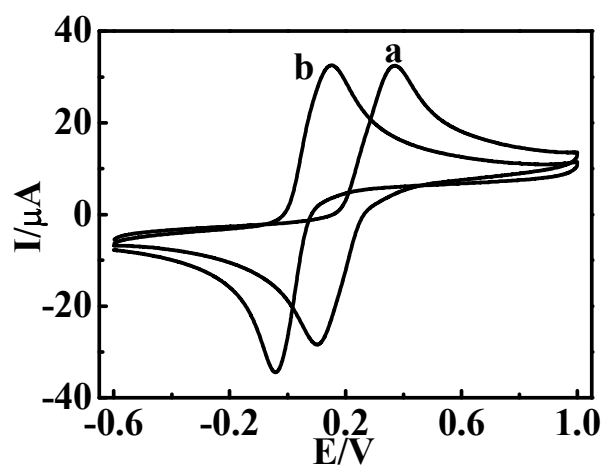

**Figure S5.** CVs of 0.5 mM hydroquinone at 0.1 V s<sup>-1</sup> at bare PG electrodes in buffers at pH (a) 4.0 and (b) 7.0.

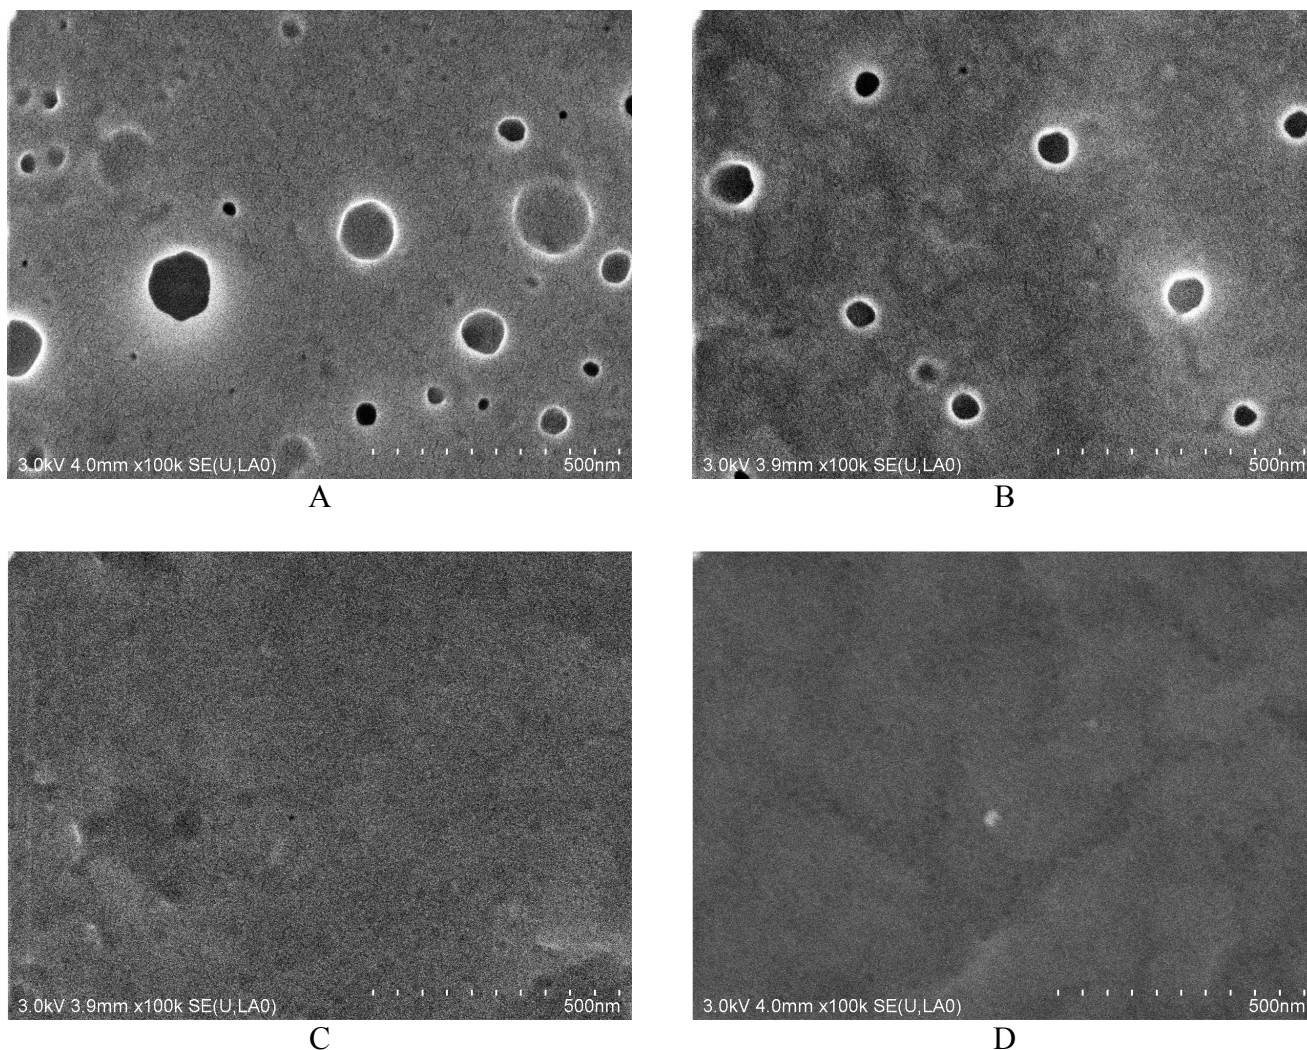

**Figure S6.** SEM top views of PSS/BPEI multilayer films assembled on Au/MPS surface after the films were immersed in buffers at different pH for 10 min: (A) BPEI/{PSS/BPEI}<sub>10</sub> films at pH 4.0, (B) BPEI/{PSS/BPEI}<sub>10</sub> films at pH 7.0, (C) BPEI/{PSS/BPEI}<sub>10</sub>/PSS films at pH 4.0, and (D) BPEI/{PSS/BPEI}<sub>10</sub>/PSS films at pH 7.0.
